# Supplementary material for: Nutrient Enrichment Predominantly Affects Low Diversity Microbiomes in a Marine Trophic Symbiosis between Algal Farming Fish and Corals
Source: MDPI journal article supplement (doi:10.3390/microorganisms9091873), 2021-09-03
Supplement: s1 [file s1]

## Supplemental Figures

Distribution of algae matrix sample sequencing depth

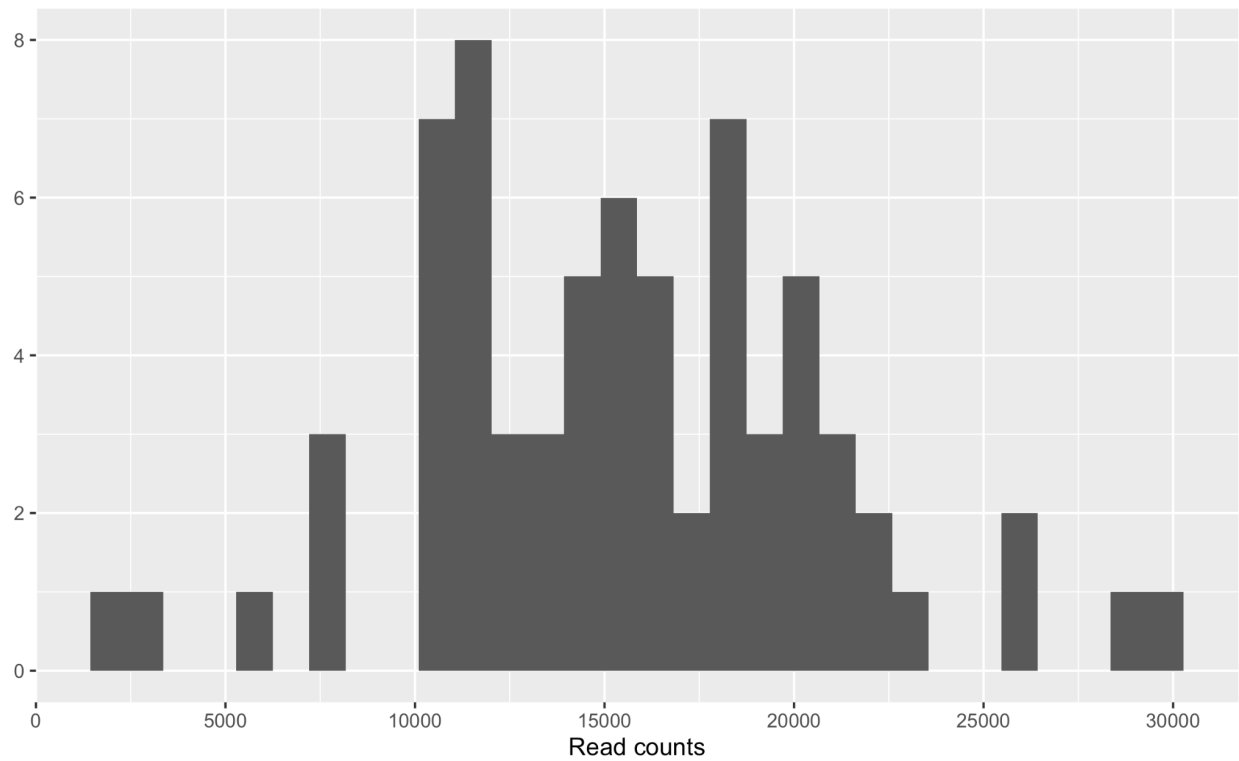

Figure S1: Histogram of the number of read counts within algal matrix microbiome samples. Samples with low read counts ( $<5,000$ ) were discarded resulting in two samples (represented by the left-most box) being removed from further analysis.

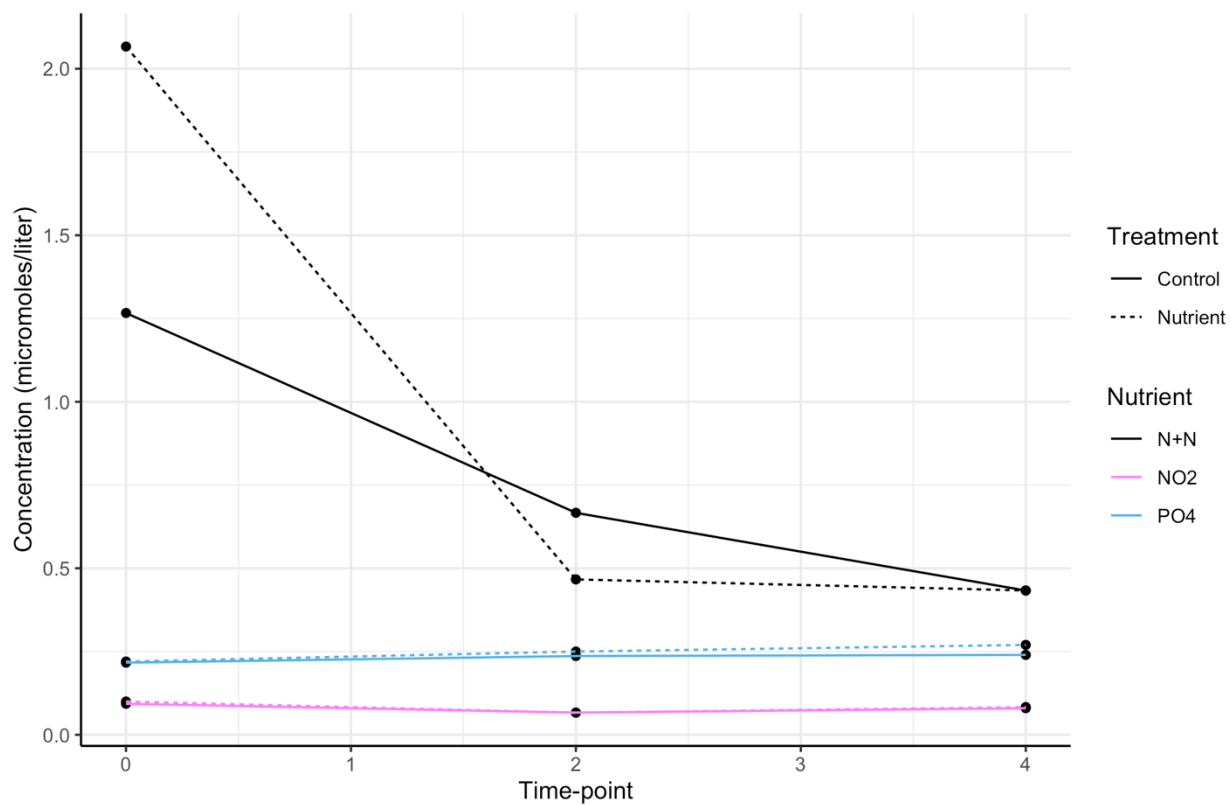

Figure S2: Water nutrient concentrations over time. Concentrations of phosphate (PO<sub>4</sub>), nitrate and nitrite (N+N), and nitrite (NO<sub>2</sub>) across the three time-points (T0, T2, and T4) water samples were taken.



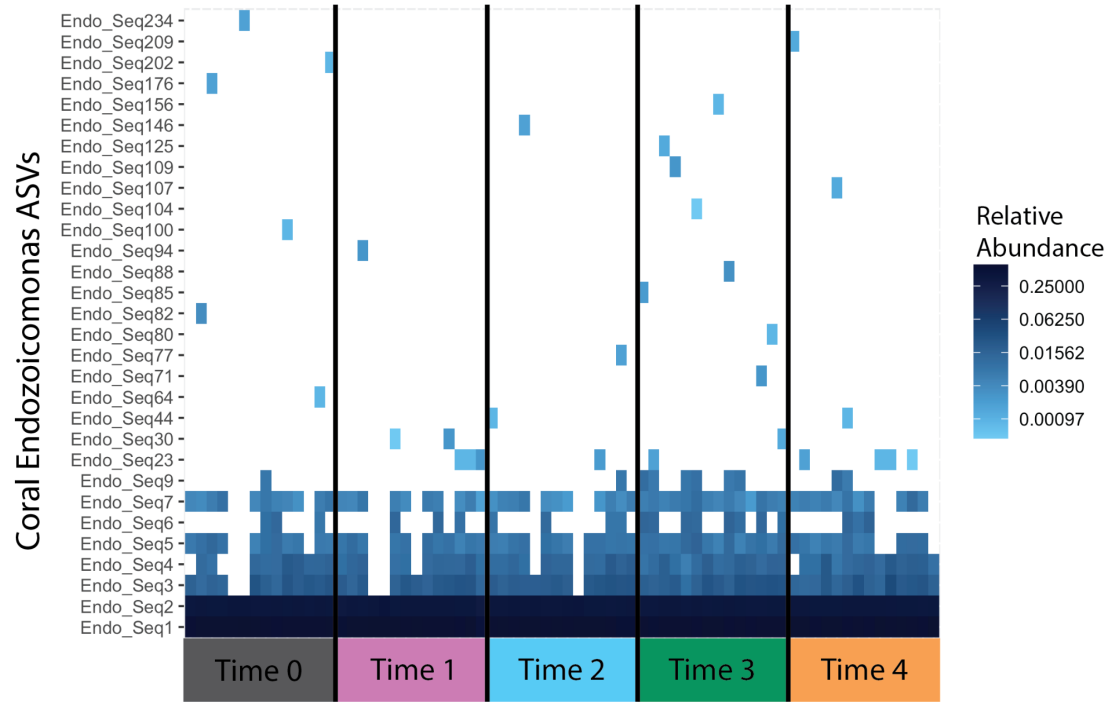

Figure S4: Relative abundance of coral microbiome *Endozoicomonas* ASVs across time. Darker colors indicate higher abundance, and no color indicates an absence of that taxa.

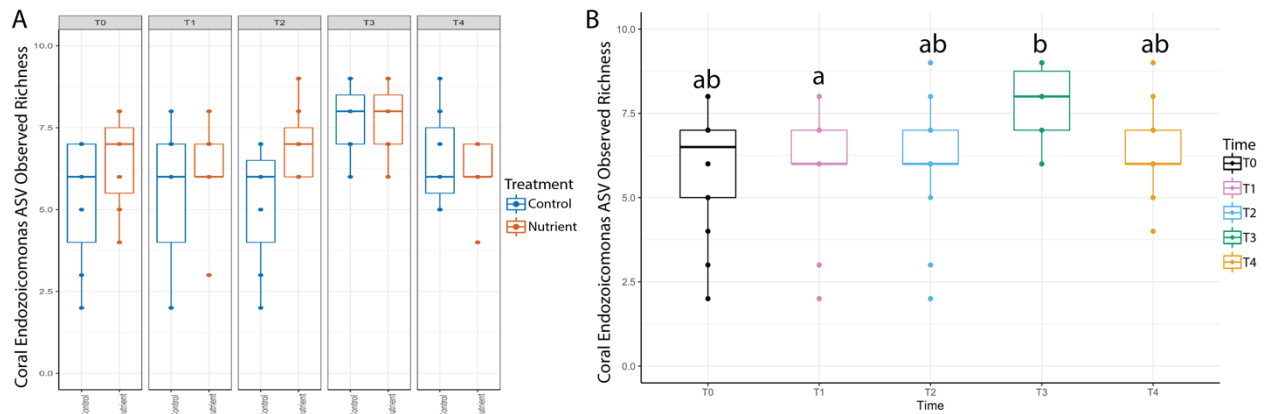

Figure S5: Changes in coral *Endozoicomonas* within sample diversity. A) Changes in coral *Endozoicomonas* across time and treatment show similar levels of richness between treatment for T0, T1, T3, and T4. T2 shows that largest difference between control and nutrient treated corals however this difference was not statistically significant. Across time, T3 had the highest increase in diversity, which was deemed statistically significant. B) Significant changes in coral *Endozoicomonas* observed richness across time, with a significant increase occurring between T1 and T2.

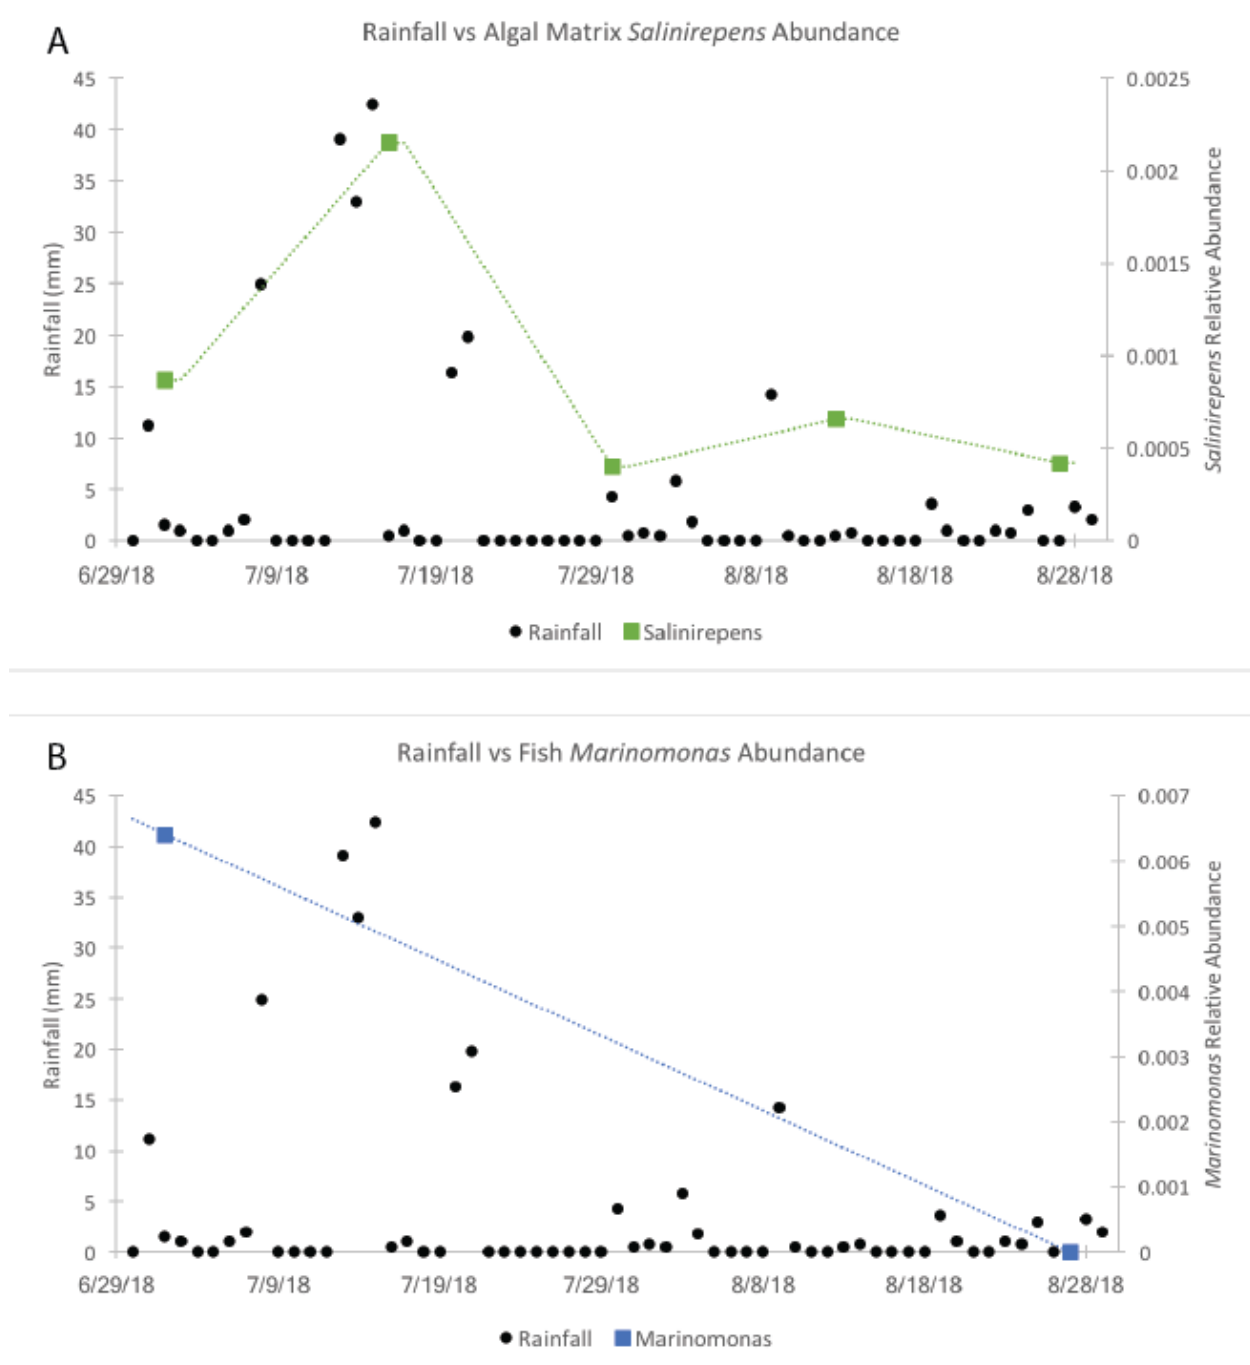

Figure S6: Changes in algal matrix *Salinirepens* and fish *Marinomonas* abundance compared to changes in rainfall across time. Each square point represents A) *Salinirepens* (green squares) and B) *Marinomonas* (blue squares) average abundance across both treatments for each sampled time point. A) *Salinirepens* abundance within algal matrix microbiomes follows rainfall patterns across all five sampled timepoints. B) *Marinomonas*, a common marine microbe, abundance decreases to 0 across the two sampled timepoints.

## Supplemental Tables

Table S1: Changes in taxa numbers throughout data processing pipeline.

| Data Processing Step                    | Number of taxa (ntaxa) for each host |            |             |
|-----------------------------------------|--------------------------------------|------------|-------------|
|                                         | ntaxa Coral                          | ntaxa Fish | ntaxa Algae |
| Silva (after DADA2)                     | 732                                  | 3,893      | 22,791      |
| Mitochondria, Chloroplast, NA filtering | 578                                  | 3,457      | 21,112      |
| Genus tip_glom                          | 335                                  | 1,117      | 6,742       |
| Rarefy                                  | 215                                  | 1,095      | 6,179       |

Table S2. Effects of treatment, time, and treatment\*time interaction on microbial community alpha diversity metrics. Alpha diversity metrics (Observed Richness, Simpson's index) were regressed against experimental variables using LMMs with experimental variables (treatment, time, treatment\*time) as the fixed effect and coral colony as random effects. Observed richness was log-transformed for each host, while Simpson's Index was arcsine-transformed to improve normality only for coral samples. P-values were approximated with the Type III Analysis of Variance with Satterthwaite's method.

| Coral Samples           |                |           |           |       |        |         |                 |
|-------------------------|----------------|-----------|-----------|-------|--------|---------|-----------------|
| Alpha diversity measure | Variables      | Sum Sq    | Mean Sq   | NumDF | DenDF  | F value | P value         |
| Observed Richness       | Treatment      | 5.0768    | 5.0768    | 1     | 12.002 | 4.9885  | <b>0.04532</b>  |
|                         | Time           | 8.7406    | 2.1851    | 4     | 48.003 | 2.1471  | 0.08934         |
|                         | Treatment*Time | 6.4114    | 1.6028    | 4     | 48.003 | 1.5750  | 0.19616         |
| Simpson's diversity     | Treatment      | 0.094118  | 0.094118  | 1     | 60     | 7.6655  | <b>0.007477</b> |
|                         | Time           | 0.027048  | 0.006762  | 4     | 60     | 0.5507  | 0.699194        |
|                         | Treatment*Time | 0.055358  | 0.013840  | 4     | 60     | 1.1272  | 0.352293        |
| Algal Matrix Samples    |                |           |           |       |        |         |                 |
| Alpha diversity measure | Variables      | Sum Sq    | Mean Sq   | NumDF | DenDF  | F value | P value         |
| Observed Richness       | Treatment      | 2.776     | 2.776     | 1     | 11.961 | 0.7571  | 0.40138         |
|                         | Time           | 154.404   | 38.601    | 4     | 46.487 | 10.5282 | <b>3.718e-6</b> |
|                         | Treatment*Time | 35.770    | 8.942     | 4     | 46.487 | 2.4390  | 0.06007         |
| Simpson's diversity     | Treatment      | 4.316e-5  | 4.3158e-5 | 1     | 11.306 | 0.2018  | 0.6617          |
|                         | Time           | 1.1743e-3 | 2.9357e-4 | 4     | 45.837 | 1.3729  | 0.2581          |

|                            | Treatment*Time | 9.0243e-4 | 2.2561e-4 | 4     | 45.837 | 1.0551  | 0.3895         |
|----------------------------|----------------|-----------|-----------|-------|--------|---------|----------------|
| <b>Fish Samples</b>        |                |           |           |       |        |         |                |
| Alpha diversity measure    | Variables      | Sum Sq    | Mean Sq   | NumDF | DenDF  | F value | P value        |
| <b>Observed Richness</b>   | Treatment      | 14.6557   | 14.6557   | 1     | 12     | 3.0223  | 0.1077         |
|                            | Time           | 4.8053    | 4.8053    | 1     | 12     | 0.9909  | 0.3392         |
|                            | Treatment*Time | 13.4057   | 13.4057   | 1     | 12     | 2.7645  | 0.1223         |
| <b>Simpson's diversity</b> | Treatment      | 7.431e-4  | 7.431e-4  | 1     | 12     | 0.8167  | 0.38392        |
|                            | Time           | 1.143e-4  | 1.143e-4  | 1     | 12     | 0.1257  | 0.72912        |
|                            | Treatment*Time | 8.666e-3  | 8.666e-3  | 1     | 12     | 9.5242  | <b>0.00943</b> |

Note: p-values defined as significant at a threshold of 0.05 are highlighted in bold.

Table S3. Effects of treatment, time, and treatment\*time interaction on microbial community dissimilarity. PERMANOVA results for differences in community dissimilarity measured by Bray Curtis dissimilarity measures by experimental variable. Only coral samples were log-transformed.

| <b>Coral Samples</b>  |                |    |           |         |         |                |              |
|-----------------------|----------------|----|-----------|---------|---------|----------------|--------------|
| Dissimilarity Measure | Measurements   | Df | SumsOfSqs | MeanSqs | F.Model | R <sup>2</sup> | P            |
| <b>Bray Curtis</b>    | Treatment      | 1  | 0.3201    | 0.32011 | 2.9362  | 0.04086        | <b>0.006</b> |
|                       | Time           | 4  | 0.5326    | 0.13314 | 1.2213  | 0.06798        | 0.152        |
|                       | Treatment*Time | 4  | 0.4401    | 0.11002 | 1.0092  | 0.05618        | 0.435        |
|                       | Residuals      | 60 | 6.5411    | 0.10902 |         | 0.83498        |              |
|                       | Total          | 69 | 7.8339    |         |         | 1.00000        |              |

| <b>Algal Matrix Samples</b> |              |    |           |         |         |                |              |
|-----------------------------|--------------|----|-----------|---------|---------|----------------|--------------|
| Dissimilarity Measure       | Measurements | Df | SumsOfSqs | MeanSqs | F.Model | R <sup>2</sup> | P            |
| <b>Bray Curtis</b>          | Treatment    | 1  | 0.2347    | 0.23467 | 1.29354 | 0.01894        | 0.071        |
|                             | Time         | 4  | 0.9817    | 0.24542 | 1.35281 | 0.07924        | <b>0.008</b> |

|                       | Treatment*Time | 4  | 0.6499    | 0.16247 | 0.89559 | 0.05246        | 0.859        |
|-----------------------|----------------|----|-----------|---------|---------|----------------|--------------|
|                       | Residuals      | 58 | 10.5219   | 0.18141 |         | 0.84935        |              |
|                       | Total          | 67 | 12.3881   |         |         | 1.00000        |              |
| Fish Samples          |                |    |           |         |         |                |              |
| Dissimilarity Measure | Measurements   | Df | SumsOfSqs | MeanSqs | F.Model | R <sup>2</sup> | P            |
| Bray Curtis           | Treatment      | 1  | 0.0728    | 0.07282 | 0.5100  | 0.01494        | 0.923        |
|                       | Time           | 1  | 1.0390    | 1.03901 | 7.2762  | 0.21321        | <b>0.001</b> |
|                       | Treatment*Time | 1  | 0.3343    | 0.33434 | 2.3414  | 0.06861        | <b>0.025</b> |
|                       | Residuals      | 24 | 3.4271    | 0.14280 |         | 0.70325        |              |
|                       | Total          | 27 | 4.8733    |         |         | 1.00000        |              |

Note: p-values defined as significant at a threshold of 0.05 are highlighted in bold.

Table S4. Effects of treatment, time, and treatment\*time interaction on microbial community group dispersion. Results of PERMDISP tests for differences in group dispersion for all 3 hosts with Bray Curtis dissimilarity measurements for treatment, time, and treatment\*time.

| Coral Samples         |                |    |          |           |         |                 |
|-----------------------|----------------|----|----------|-----------|---------|-----------------|
| Dissimilarity Measure | Variable       | Df | Sum Sq   | Mean Sq   | F value | P               |
| Bray Curtis           | Treatment      | 1  | 0.14342  | 0.143415  | 5.3722  | <b>0.02348</b>  |
|                       | Time           | 4  | 0.09777  | 0.024442  | 0.901   | 0.4687          |
|                       | Treatment*Time | 9  | 0.41346  | 0.04594   | 1.9675  | 0.05919         |
| Algal Matrix Samples  |                |    |          |           |         |                 |
| Dissimilarity Measure | Variable       | Df | Sum Sq   | Mean Sq   | F value | P               |
| Bray Curtis           | Treatment      | 1  | 0.002647 | 0.002647  | 1.112   | 0.2955          |
|                       | Time           | 4  | 0.042304 | 0.0105761 | 4.553   | <b>0.002708</b> |
|                       | Treatment*Time | 9  | 0.062803 | 0.0069781 | 2.8941  | <b>0.006777</b> |
| Fish Samples          |                |    |          |           |         |                 |

| Dissimilarity Measure | Variable       | Df | Sum Sq  | Mean Sq   | F value | P                |
|-----------------------|----------------|----|---------|-----------|---------|------------------|
| Bray Curtis           | Treatment      | 1  | 0.00089 | 0.0008853 | 0.0525  | 0.8205           |
|                       | Time           | 1  | 0.15678 | 0.156783  | 23.562  | <b>4.939e-05</b> |
|                       | Treatment*Time | 3  | 0.20402 | 0.068007  | 13.991  | 1.764e-05        |

Note: p-values defined as significant at a threshold of 0.05 are highlighted in bold.

Table S5: BLASTn similarities (top 5 based on Max Score) of differentially abundant genera identified within Family *Vibrionaceae* in fish microbiome samples.

| Description                                                                     | Scientific Name           | Max Score | Total Score | Query Cover | E value   | Per. ident | Acc. Len | Accession                  |
|---------------------------------------------------------------------------------|---------------------------|-----------|-------------|-------------|-----------|------------|----------|----------------------------|
| <i>Vibrio sinaloensis</i> strain W37 16S ribosomal RNA gene, partial sequence   | <i>Vibrio sinaloensis</i> | 401       | 401         | 99%         | 1.00E-107 | 94.59      | 1332     | <a href="#">MT605274.1</a> |
| Bacterium strain MRB-09 16S ribosomal RNA gene, partial sequence                | bacterium                 | 401       | 401         | 99%         | 1.00E-107 | 94.59      | 1414     | <a href="#">KX941474.1</a> |
| <i>Vibrio sp.</i> strain B-RD_1 16S ribosomal RNA gene, partial sequence        | <i>Vibrio sp.</i>         | 401       | 401         | 99%         | 1.00E-107 | 94.59      | 1042     | <a href="#">MF033528.1</a> |
| <i>Vibrio sinaloensis</i> partial 16S rRNA gene, strain JC96, isolate Pkl-8     | <i>Vibrio sinaloensis</i> | 401       | 401         | 99%         | 1.00E-107 | 94.59      | 1348     | <a href="#">FR837600.1</a> |
| <i>Vibrio vulnificus</i> strain G23-21 16S ribosomal RNA gene, partial sequence | <i>Vibrio vulnificus</i>  | 401       | 401         | 99%         | 1.00E-107 | 94.59      | 1083     | <a href="#">GU143892.1</a> |
