# Supplementary material for: Nutrient Enrichment Predominantly Affects Low Diversity Microbiomes in a Marine Trophic Symbiosis between Algal Farming Fish and Corals
Source: Microorganisms. 2021 Sep 3;9(9):1873. doi: 10.3390/microorganisms9091873 (PMC8471015; doi:10.3390/microorganisms9091873)
Supplement: Supplementary file 1 [file microorganisms-09-01873-s001.zip]

Archive with 5 entries (5 files):
- File S1 coral_read_nums.txt
- File S2 algae_read_nums.txt
- File S3 fish_read_nums.txt
- File S4 Coral_Endo_ASV_seq.txt
- microorganisms-1356818-supplementary.pdf
