# Supplementary material for: Nutrient Enrichment Predominantly Affects Low Diversity Microbiomes in a Marine Trophic Symbiosis between Algal Farming Fish and Corals
Source: Microorganisms. 2021 Sep 3;9(9):1873. doi: 10.3390/microorganisms9091873 (PMC8471015; doi:10.3390/microorganisms9091873)
Supplement: Supplementary file 1 [file microorganisms-09-01873-s001.zip › File S1 coral_read_nums.txt]

sample	raw	cutadapt	dada2	mitos_removed	chloros_removed	NAs_removed	genus_tip_glom	rarefied
C-T0-487	10259	9325	8661	8661	8603	8603	8603	2308
C-T0-488	24371	22191	21474	21474	21463	21400	21400	2308
C-T0-489	14399	12601	12190	12190	12154	12062	12062	2308
C-T0-490	8937	7878	7527	7527	7517	7454	7454	2308
C-T0-491	6799	6150	5809	5809	5804	5804	5804	2308
C-T0-492	3954	3610	3406	3406	3406	3406	3406	2308
C-T0-493	16961	15489	15076	15076	15072	15072	15072	2308
C-T0-494	30196	27603	26827	26827	26738	26615	26615	2308
C-T0-495	29404	26889	26287	26287	25871	25816	25816	2308
C-T0-496	27704	24097	23280	23280	23280	23280	23280	2308
C-T0-497	15021	13650	13299	13299	13241	13133	13133	2308
C-T0-498	7336	6640	6332	6332	6332	6332	6332	2308
C-T0-499	33799	30815	30075	30075	30035	29911	29911	2308
C-T0-500	10111	9185	8972	8972	8954	8883	8883	2308
C-T1-487	18966	17317	16491	16491	16407	16319	16319	2308
C-T1-488	19220	17532	17039	17039	17021	16911	16911	2308
C-T1-489	19594	17446	16999	16999	16999	16944	16944	2308
C-T1-490	5962	5233	4858	4858	4839	4839	4839	2308
C-T1-491	4412	3821	3508	3508	3508	3508	3508	2308
C-T1-492	25229	23037	22335	22335	22335	22145	22145	2308
C-T1-493	12710	11575	11200	11200	11196	11103	11103	2308
C-T1-494	5394	4912	4658	4658	4658	4630	4630	2308
C-T1-495	16410	14871	14395	14395	14364	14310	14310	2308
C-T1-496	24632	21833	21161	21161	21122	21071	21071	2308
C-T1-497	13255	11564	11157	11157	11134	11099	11099	2308
C-T1-498	21940	19847	19301	19301	19266	19060	19060	2308
C-T1-499	27718	25040	24290	24290	24279	24180	24180	2308
C-T1-500	19892	18154	16225	16225	15985	15896	15896	2308
C-T2-487	25562	23487	22938	22938	22915	22864	22864	2308
C-T2-488	29996	27542	26720	26720	26653	26568	26568	2308
C-T2-489	25254	22345	21650	21650	21633	21515	21515	2308
C-T2-490	12013	10597	10261	10261	10245	10203	10203	2308
C-T2-491	6703	6079	5774	5774	5768	5768	5768	2308
C-T2-492	21328	19454	18876	18876	18876	18824	18824	2308
C-T2-493	16672	15111	14609	14609	14600	14564	14564	2308
C-T2-494	14406	13178	12810	12798	12688	12667	12667	2308
C-T2-495	2593	2365	2308	2308	2308	2308	2308	2308
C-T2-496	9177	8199	7898	7898	7898	7898	7898	2308
C-T2-497	10982	9950	9613	9613	9613	9613	9613	2308
C-T2-498	39181	35548	34403	34400	34338	34338	34338	2308
C-T2-499	31666	28876	26997	26989	26841	26789	26789	2308
C-T2-500	20650	18927	18020	18017	17955	17881	17881	2308
C-T3-487	33381	30338	29509	29509	29346	29201	29201	2308
C-T3-488	33425	29870	27309	27307	26464	26357	26357	2308
C-T3-489	24378	21058	20288	20288	20166	20018	20018	2308
C-T3-490	13887	12181	11754	11754	11698	11575	11575	2308
C-T3-491	26599	23730	22525	22525	22200	22092	22092	2308
C-T3-492	34411	31200	30328	30328	30300	30093	30093	2308
C-T3-493	12406	11077	10723	10723	10706	10637	10637	2308
C-T3-494	20692	18774	18185	18185	18101	18008	18008	2308
C-T3-495	27604	24922	24230	24230	24107	24061	24061	2308
C-T3-496	39805	34557	33403	33403	33122	33026	33026	2308
C-T3-497	11045	9698	9016	9016	8986	8934	8934	2308
C-T3-498	29437	26443	25685	25685	25641	25543	25543	2308
C-T3-499	28142	25166	24244	24244	24132	23949	23949	2308
C-T3-500	37051	33481	32563	32563	32511	32344	32344	2308
C-T4-487	12964	11663	11197	11197	11119	11024	11024	2308
C-T4-488	20218	18287	17673	17673	17464	17260	17260	2308
C-T4-489	21901	19012	17849	17849	17737	17448	17448	2308
C-T4-490	7984	6518	6173	6173	6119	6045	6045	2308
C-T4-491	18125	16174	15473	15473	15460	15167	15167	2308
C-T4-492	41128	37169	36102	36102	35930	35478	35478	2308
C-T4-493	33972	30468	29563	29550	29387	29210	29210	2308
C-T4-494	25851	23405	22720	22720	22629	22441	22441	2308
C-T4-495	10407	9356	9128	9128	9089	9034	9034	2308
C-T4-496	17981	15634	15010	15010	14817	14770	14770	2308
C-T4-497	16397	14502	14007	14007	13856	13685	13685	2308
C-T4-498	13618	12203	11744	11744	11636	11536	11536	2308
C-T4-499	10361	9132	8706	8706	8684	8607	8607	2308
C-T4-500	10415	9323	8982	8982	8929	8830	8830	2308
