# Supplementary material for: Nutrient Enrichment Predominantly Affects Low Diversity Microbiomes in a Marine Trophic Symbiosis between Algal Farming Fish and Corals
Source: Microorganisms. 2021 Sep 3;9(9):1873. doi: 10.3390/microorganisms9091873 (PMC8471015; doi:10.3390/microorganisms9091873)
Supplement: Supplementary file 1 [file microorganisms-09-01873-s001.zip › File S2 algae_read_nums.txt]

sample	raw	cutadapt	dada2	mitos_removed	chloros_removed	NAs_removed	genus_tip_glom (after  2 sample removal)	rarefied
A-T0-487	43799	39793	31416	31161	21183	21162	21162	5973
A-T0-488	63664	58033	46330	45913	29766	29434	29434	5973
A-T0-489	47658	41385	30450	30312	19814	19592	19592	5973
A-T0-490	9105	7555	4105	4038	1571	1559		
A-T0-491	46389	40592	30540	29952	13388	13357	13357	5973
A-T0-492	56114	50682	40683	40088	18438	18399	18399	5973
A-T0-493	10448	9445	5703	5593	2526	2526		
A-T0-494	58376	53070	40228	39356	17859	17834	17834	5973
A-T0-495	53065	48452	36010	35510	19918	19883	19883	5973
A-T0-496	48188	41980	31977	31707	18258	18236	18236	5973
A-T0-497	65297	58698	45489	44336	21208	21196	21196	5973
A-T0-498	64233	58011	45153	44300	25753	25721	25721	5973
A-T0-499	59756	54170	41609	40985	20345	20288	20288	5973
A-T0-500	76064	69494	57483	56185	29407	29302	29302	5973
A-T1-487	42837	39089	29235	28810	11835	11764	11764	5973
A-T1-488	51569	46989	34611	34166	20744	20708	20708	5973
A-T1-489	48941	42473	33259	32912	22396	22336	22336	5973
A-T1-490	37167	32456	22019	21718	11357	11114	11114	5973
A-T1-491	47952	43336	31192	30825	14391	14373	14373	5973
A-T1-492	47666	43291	33310	33053	15288	15286	15286	5973
A-T1-493	52991	47928	33927	33481	17047	16802	16802	5973
A-T1-494	57134	52343	37746	36882	14838	14731	14731	5973
A-T1-495	48002	44371	27943	27626	10494	10451	10451	5973
A-T1-496	44038	38058	26451	26241	19808	19780	19780	5973
A-T1-497	62065	55378	41391	41016	22193	21667	21667	5973
A-T1-498	77521	70427	52460	51496	26422	26358	26358	5973
A-T1-499	62330	56448	41808	41255	22953	22904	22904	5973
A-T1-500	56889	52019	36900	35425	14821	14696	14696	5973
A-T2-487	33281	30323	23032	22799	7912	7908	7908	5973
A-T2-488	44952	40997	30048	29802	11318	11253	11253	5973
A-T2-489	30890	27149	17677	17477	11837	11617	11617	5973
A-T2-490	43911	38684	33247	32872	18359	18204	18204	5973
A-T2-491	42307	38206	26834	26163	10839	10833	10833	5973
A-T2-492	50920	46477	32326	32101	20122	19600	19600	5973
A-T2-493	57861	52968	35532	35015	20337	20303	20303	5973
A-T2-494	59117	54416	38713	37606	16554	16519	16519	5973
A-T2-495	49368	45157	30429	29985	17664	17629	17629	5973
A-T2-496	39383	34651	22951	22807	12903	12824	12824	5973
A-T2-497	37606	34146	24464	23895	13349	13326	13326	5973
A-T2-498	42038	38028	28370	27702	11487	11470	11470	5973
A-T2-499	43876	36840	25401	24837	8026	8016	8016	5973
A-T2-500	84481	77368	56840	53577	18961	18947	18947	5973
A-T3-487	28528	26206	19760	19635	10847	10830	10830	5973
A-T3-488	45975	41905	32329	32171	15071	14680	14680	5973
A-T3-489	26331	22196	16656	16348	12059	11835	11835	5973
A-T3-490	20189	16888	11295	11081	7361	7331	7331	5973
A-T3-491	40253	36423	25229	24991	16297	15718	15718	5973
A-T3-492	36832	33114	26148	25908	15076	14711	14711	5973
A-T3-493	27299	24825	17214	16954	10917	10230	10230	5973
A-T3-494	44006	40484	28710	28431	17142	15755	15755	5973
A-T3-495	37160	34085	22803	22628	12965	12961	12961	5973
A-T3-496	38521	34052	22912	22536	10653	10488	10488	5973
A-T3-497	34181	31194	22745	21704	11397	11203	11203	5973
A-T3-498	42125	37770	28275	27854	13586	13575	13575	5973
A-T3-499	45515	41436	28383	28240	14946	14940	14940	5973
A-T3-500	45199	41440	30667	30103	17502	17477	17477	5973
A-T4-487	34045	31017	24262	24071	12565	12518	12518	5973
A-T4-488	31479	28685	25873	25466	11977	11945	11945	5973
A-T4-489	28265	24853	18933	18623	11009	10452	10452	5973
A-T4-490	36964	32723	26460	25872	16116	15613	15613	5973
A-T4-491	33253	29864	21848	21149	10898	10872	10872	5973
A-T4-492	41524	37684	30913	30609	16173	15946	15946	5973
A-T4-493	36069	31615	25277	24654	16598	16511	16511	5973
A-T4-494	43693	39885	31216	30804	16816	15453	15453	5973
A-T4-495	43117	39324	32155	31653	18503	18472	18472	5973
A-T4-496	40071	34970	26382	25731	16329	16291	16291	5973
A-T4-497	42497	38103	29513	29239	20985	20503	20503	5973
A-T4-498	55792	50648	38562	36694	18138	18092	18092	5973
A-T4-499	21904	19883	13074	13030	5995	5973	5973	5973
A-T4-500	40785	36978	30073	28364	18063	17946	17946	5973
