# Supplementary material for: Nutrient Enrichment Predominantly Affects Low Diversity Microbiomes in a Marine Trophic Symbiosis between Algal Farming Fish and Corals
Source: Microorganisms. 2021 Sep 3;9(9):1873. doi: 10.3390/microorganisms9091873 (PMC8471015; doi:10.3390/microorganisms9091873)
Supplement: Supplementary file 1 [file microorganisms-09-01873-s001.zip › File S3 fish_read_nums.txt]

sample	raw	cutadapt	dada2	mitos_removed	chloros_removed	NAs_removed	genus_tip_glom	rarefied
F-T0-487	12502	11354	10207	10207	10123	10097	10097	10097
F-T0-488	27493	22740	20307	20293	19815	19231	19231	10097
F-T0-489	25462	22044	19520	19506	19404	19368	19368	10097
F-T0-490	18570	16280	15291	15284	15187	15158	15158	10097
F-T0-491	40584	35770	31403	31371	29564	29492	29492	10097
F-T0-492	34743	31566	28612	28565	27904	27839	27839	10097
F-T0-493	40451	36673	33942	33827	31741	31721	31721	10097
F-T0-494	14628	13187	11682	11682	11614	11601	11601	10097
F-T0-495	34865	31639	28806	28726	27787	27787	27787	10097
F-T0-496	17829	15357	14074	14067	13995	13897	13897	10097
F-T0-497	39834	35808	32604	32340	31370	31322	31322	10097
F-T0-498	19459	17516	16183	15904	15120	15079	15079	10097
F-T0-499	43991	39509	35662	35449	34743	34674	34674	10097
F-T0-500	24635	22386	20832	20799	19618	19618	19618	10097
F-T4-487	31430	28491	24957	24926	23812	23812	23812	10097
F-T4-488	38200	34645	31219	31004	28902	28855	28855	10097
F-T4-489	40632	36233	30028	29964	27885	27870	27870	10097
F-T4-490	36268	32260	27829	27773	25946	25946	25946	10097
F-T4-491	19114	16397	14195	14068	11477	11461	11461	10097
F-T4-492	52290	47671	39073	38672	28750	28750	28750	10097
F-T4-493	27532	24138	19701	19643	17046	17046	17046	10097
F-T4-494	34143	31117	27977	27706	22551	22537	22537	10097
F-T4-495	35452	31313	25802	25704	23151	23126	23126	10097
F-T4-496	44264	39660	33705	33611	29705	29663	29663	10097
F-T4-497	66023	58969	50573	50504	49463	49463	49463	10097
F-T4-498	59791	54006	48162	48026	43755	43738	43738	10097
F-T4-499	46398	41672	36142	36135	35813	35793	35793	10097
F-T4-500	19178	17299	14920	14920	14631	14631	14631	10097
